# Supplementary material for: Engineering microbial division of labor for plastic upcycling
Source: Springer Nature journal article supplement (doi:10.1038/s41467-023-40777-x), 2023-09-26
Supplement: MOESM1 [file 41467_2023_40777_MOESM1_ESM.pdf]

## **Supplementary Information**

### **Engineering Microbial Division of Labor for Plastic Upcycling**

Teng Bao<sup>1,2,9</sup>, Yuanchao Qian<sup>1,2,9</sup>, Yongping Xin<sup>1,2,9</sup>, James J. Collins<sup>3,4,5,\*</sup>, and Ting Lu<sup>1,2,6,7,8,\*</sup>

<sup>1</sup> Department of Bioengineering, University of Illinois Urbana-Champaign, Urbana, IL, USA

<sup>2</sup> Carl R. Woese Institute for Genomic Biology, University of Illinois Urbana-Champaign, Urbana, IL, USA

<sup>3</sup> Department of Biological Engineering and Institute for Medical Engineering & Science, Massachusetts Institute of Technology, Cambridge, MA, USA

<sup>4</sup> Wyss Institute for Biologically Inspired Engineering, Harvard University, Longwood, MA, USA

<sup>5</sup> Broad Institute of MIT and Harvard, Cambridge, MA, USA

<sup>6</sup> Center for Biophysics and Quantitative Biology, University of Illinois Urbana-Champaign, Urbana, IL, USA

<sup>7</sup> Department of Physics, University of Illinois Urbana-Champaign, Urbana, IL, USA

<sup>8</sup> National Center for Supercomputing Applications, Urbana, IL 61801, USA

<sup>9</sup> These authors contributed equally to the work.

\*Corresponding authors. E-mail: luting@illinois.edu and jimjc@mit.edu

## Supplementary Tables

**Supplementary Table 1: Strains and plasmids used in this study.**

| Name                           | Description                                                                                                                                                                                    | Source or Reference                       |
|--------------------------------|------------------------------------------------------------------------------------------------------------------------------------------------------------------------------------------------|-------------------------------------------|
| <b>Strains</b>                 |                                                                                                                                                                                                |                                           |
| <i>Pseudomonas putida</i> EM42 | KT2440 derivative; $\Delta$ prophage1 $\Delta$ prophage4 $\Delta$ prophage3 $\Delta$ prophage2 $\Delta$ Tn7 $\Delta$ endA-1 $\Delta$ endA-2 $\Delta$ hsdRMS $\Delta$ flagellum $\Delta$ Tn4652 | Martínez-García et al., 2014 <sup>1</sup> |
| Pp00 (Pp-T <sub>0</sub> )      | EM42 derivative; contains the plasmid pBb(B5)1k-tpa, Km <sup>R</sup>                                                                                                                           | This study                                |
| Pp01                           | EM42 derivative; $\Delta$ ped                                                                                                                                                                  | This study                                |
| Pp02 (Pp-T)                    | Pp01 derivative; contains the plasmid pBb(B5)1k-tpa, Km <sup>R</sup>                                                                                                                           | This study                                |
| Pp03 (Pp-TS)                   | Pp01 derivative; contains the plasmids pBb(B5)1k-tpa and pSEVA421, Sm <sup>R</sup> , Km <sup>R</sup>                                                                                           | This study                                |
| Pp04 (Pp-TP)                   | Pp01 derivative; contains the plasmids pBb(B5)1k-tpa and pSEVA421-phaG-alkK-phaC1-phaC2, Sm <sup>R</sup> , Km <sup>R</sup>                                                                     | This study                                |
| Pp05                           | Pp01 derivative; $\Delta$ ped, $\Delta$ phaZ, $\Delta$ fadBA $\Delta$ fadBAxE                                                                                                                  | This study                                |
| Pp06 (Pp $\Delta$ -TP)         | Pp05 derivative; contains the plasmids pBb(B5)1k-tpa and pSEVA421-phaG-alkK-phaC1-phaC2, Sm <sup>R</sup> , Km <sup>R</sup>                                                                     | This study                                |
| Pp07                           | Pp01 derivative; $\Delta$ catRBCA                                                                                                                                                              | This study                                |
| Pp08 (Pp-TC)                   | Pp07 derivative; contains the plasmids pBb(B5)1k-tpa and pSEVA421-aroY-EcdB, Sm <sup>R</sup> , Km <sup>R</sup>                                                                                 | This study                                |
| <i>Pseudomonas putida</i> M31  | EM42 derivative; UV mutation, has an ability to metabolize ethylene glycol                                                                                                                     | Lab stock                                 |
| PpM01                          | M31 derivative; $\Delta$ gclR                                                                                                                                                                  | This study                                |
| PpM02 (Pp-E)                   | PpM01 derivative; synthetic expression cassette (P <sub>tac</sub> -glcDEF) in chromosome                                                                                                       | This study                                |
| PpM03 (Pp-TE)                  | PpM02 derivative; contains the plasmid pBb(B5)1k-tpa, Km <sup>R</sup>                                                                                                                          | This study                                |
| PpM03 (Pp-ES)                  | PpM02 derivative; contains the plasmid pSEVA421, Sm <sup>R</sup>                                                                                                                               | This study                                |
| PpM04 (Pp-EP)                  | PpM02 derivative; contains the plasmid pSEVA421-phaG-alkK-phaC1-phaC2, Sm <sup>R</sup>                                                                                                         | This study                                |
| PpM05 (Pp-TES)                 | PpM02 derivative; contains the plasmids pBb(B5)1k-tpa and pSEVA421, Sm <sup>R</sup> , Km <sup>R</sup>                                                                                          | This study                                |
| PpM06 (Pp-TEP)                 | PpM02 derivative; contains the plasmids pBb(B5)1k-tpa and pSEVA421-phaG-alkK-phaC1-phaC2, Sm <sup>R</sup> , Km <sup>R</sup>                                                                    | This study                                |
| PpM06 (Pp $\Delta$ -E)         | PpM02 derivative; $\Delta$ phaZ $\Delta$ fadBA $\Delta$ fadBAxE                                                                                                                                | This study                                |
| PpM07 (Pp $\Delta$ -EP)        | PpM06 derivative; contains the plasmid pSEVA421-phaG-alkK-phaC1-phaC2, Sm <sup>R</sup>                                                                                                         | This study                                |
| PpM08 (Pp $\Delta$ -TEP)       | PpM06 derivative; contains the plasmids pBb(B5)1k-tpa and pSEVA421-phaG-alkK-phaC1-phaC2, Sm <sup>R</sup> , Km <sup>R</sup>                                                                    | This study                                |
| PpM09                          | PpM02 derivative; $\Delta$ catRBC with synthetic expression cassette (P <sub>tac</sub> -catA) in chromosome                                                                                    | This study                                |
| PpM10 (Pp-EM)                  | PpM09 derivative; contains the plasmid pSEVA421, Sm <sup>R</sup>                                                                                                                               | This study                                |

|                                |                                                                                                                                                                             |                                       |
|--------------------------------|-----------------------------------------------------------------------------------------------------------------------------------------------------------------------------|---------------------------------------|
| PpM11 (Pp-TEM)                 | PpM09 derivative; contains the plasmids pBb(B5)1k-tpa and pSEVA421-aroY-ecdB, Sm <sup>R</sup> , Km <sup>R</sup>                                                             | This study                            |
| <b>Plasmids</b>                |                                                                                                                                                                             |                                       |
| pBb(B5)1k-GFPuv                | <i>E. coli</i> and <i>P. putida</i> shuttle vector, IPTG-inducible P <sub>trc</sub> promoter expressing GFPuv, BBR1-B5 origin, Km <sup>R</sup>                              | Cook et al., 2018 <sup>2</sup>        |
| pBb(B5)1k-tpa                  | Expression plasmid, constitutive expression of tpa operon (tpaAa-tpaAb-tpaC-tpaB-tpaK from <i>Rhodococcus jostii</i> RHA1) using P <sub>tac</sub> promoter, Km <sup>R</sup> | This study                            |
| pSEVA421                       | <i>E. coli</i> and <i>P. putida</i> shuttle vector, oriV (RK2) origin; Sm <sup>R</sup>                                                                                      | Silva-Rocha et al., 2012 <sup>3</sup> |
| pSEVA421-phaG-alkK-phaC1-phaC2 | Expression plasmid, constitutive expression of phaG-alkK - phaC1-phaC2 using P <sub>EM7</sub> promoter, Sm <sup>R</sup>                                                     | This study                            |
| pSEVA421-aroY-ecdB             | Expression plasmid, constitutive expression of aroY-ecdB using P <sub>tac</sub> promoter, Sm <sup>R</sup>                                                                   | This study                            |
| pK18mobsacB                    | Gene knockout vector, Km <sup>R</sup>                                                                                                                                       | Schäfer et al., 1994 <sup>4</sup>     |
| pK18-ped                       | Gene knockout vector, pK18mobsacB containing the homologous arms of the <i>ped</i> DNA region of EM42, Km <sup>R</sup>                                                      | This study                            |
| pK18-gclR                      | Gene knockout vector, pK18mobsacB containing the homologous arms of the <i>gclR</i> DNA region of EM42, Km <sup>R</sup>                                                     | This study                            |
| pK18-Pro-glcDEF                | Gene knockout vector, pK18mobsacB containing the homologous arms of the <i>glcDEF</i> DNA region of EM42 and P <sub>tac</sub> -glcDEF cassette, Km <sup>R</sup>             | This study                            |
| pK18-phaZ                      | Gene knockout vector, pK18mobsacB containing the homologous arms of the <i>phaZ</i> DNA region of EM42, Km <sup>R</sup>                                                     | This study                            |
| pK18-fadBA                     | Gene knockout vector, pK18mobsacB containing the homologous arms of the <i>fadBA</i> DNA region of EM42, Km <sup>R</sup>                                                    | This study                            |
| pK18-fadBAxE                   | Gene knockout vector, pK18mobsacB containing the homologous arms of the <i>fadBAxE</i> DNA region of EM42, Km <sup>R</sup>                                                  | This study                            |
| pK18-catRBC                    | Gene knockout vector, pK18mobsacB containing the homologous arms of the <i>catRBC</i> DNA region of EM42 and P <sub>tac</sub> promoter, Km <sup>R</sup>                     | This study                            |
| pK18-catRBCA                   | Gene knockout vector, pK18mobsacB containing the homologous arms of the <i>catRBCA</i> DNA region of EM42, Km <sup>R</sup>                                                  | This study                            |

**Supplementary Table 2: Sequence information for genes, promoters, and insertion fragments.**

| Primer Name                                                    | Primer sequence                                                 | Description                                                                                                     |
|----------------------------------------------------------------|-----------------------------------------------------------------|-----------------------------------------------------------------------------------------------------------------|
| For <i>ped</i> gene deletion plasmid construction              |                                                                 |                                                                                                                 |
| PK18-F                                                         | CCGGATGAATGTCAGCTACT                                            | To clone the 5100 bp DNA fragment from the pK18mobsacB.                                                         |
| PK18-R                                                         | GCGGTAATACGGTTATCCAC                                            |                                                                                                                 |
| ped-UF                                                         | TACAGGCCCCACCGCGTCGCGGCCTT<br>C                                 | To clone the 1481 bp upstream DNA fragment of <i>ped</i> gene from the <i>P. putida</i> EM42 chromosome.        |
| ped-UR                                                         | AGTAGCTGACATTCATCCGGTCTCGC<br>GCAGCGCAATATCAGTAGGG              |                                                                                                                 |
| ped-DF                                                         | GTGGATAACCGTATTACCGCGCTGGT<br>GCACAACTTGATCCG                   | To clone the 1292 bp downstream DNA fragment of <i>ped</i> gene from the <i>P. putida</i> EM42 chromosome.      |
| ped-DR                                                         | GACGCGGTGGGGCCTGTAGGCGC                                         |                                                                                                                 |
| V-ped-F                                                        | TGCGGGTGGCGGGGTGA                                               | To verify the <i>ped</i> gene deletion strain, wild strain yields 10002 bp, the $\Delta ped$ yields 409 bp.     |
| V-ped-R                                                        | TTAATGCACGGGGGCGGACTG                                           |                                                                                                                 |
| For <i>gclR</i> gene deletion plasmid construction             |                                                                 |                                                                                                                 |
| pk18-F1                                                        | TGGCGCACATCCATAAGCTTGGCACT<br>GGCCGTCGTTTTACAA                  | To clone the 5724 bp DNA fragment from the pK18mobsacB.                                                         |
| pk18-R1                                                        | CAGATAACCCTTCTGGGATCCCCGGG<br>TACCGAGCTCGAATTCGTAA              |                                                                                                                 |
| gclR-UF                                                        | CACGCAGGCAAACGAGGGCTCTCGA<br>GGCACGAAGAGAAAGTATGG               | To clone the 1462 bp upstream DNA fragment of <i>gclR</i> gene from the <i>P. putida</i> EM42 chromosome.       |
| gclR-UR                                                        | GCCAGTGCCAAGCTTATGGATGTGCG<br>CCATGCTGCCCATCATC                 |                                                                                                                 |
| gclR-DF                                                        | GGTACCCGGGGATCCCAGAAGGGTT<br>ATCTGGACGTCTACGATCACTTCGAG<br>CTGC | To clone the 1431 bp downstream DNA fragment of <i>gclR</i> gene from the <i>P. putida</i> EM42 chromosome.     |
| gclR-DR                                                        | GTGCCTCGAGAGCCCTCGTTTGCCTG<br>CGTGATCGAGGGGCTG                  |                                                                                                                 |
| V-gclR-F                                                       | ATCACCTGGGCGATCACATAAGGCAG                                      | To verify the <i>ped</i> gene deletion strain, wild strain yields 1646 bp, the $\Delta gclR$ yields 409 bp.     |
| V-gclR-R                                                       | CCATGATGTTGGGGTTGACGAAGATG<br>ATGTAGG                           |                                                                                                                 |
| For $P_{tac}$ - <i>glcDEF</i> integration plasmid construction |                                                                 |                                                                                                                 |
| PK18-F                                                         | CCGGATGAATGTCAGCTACT                                            | To clone the 5100 bp DNA fragment from the pK18mobsacB.                                                         |
| PK18-R                                                         | GCGGTAATACGGTTATCCAC                                            |                                                                                                                 |
| glcDEF-UF                                                      | ATGAATATCCTGTACGACGAACGCGT<br>CG                                | To clone the 1520 bp upstream DNA fragment of <i>glcDEF</i> operon from the <i>P. putida</i> EM42 chromosome.   |
| glcDEF-UR                                                      | AGTAGCTGACATTCATCCGGTCAGAA<br>GCGCTCCAGCTCGGGGAAGG              |                                                                                                                 |
| glcDEF-DF                                                      | GTGGATAACCGTATTACCGCCCCTTC<br>GCTGTATTCGACCTTCAAGG              | To clone the 1254 bp downstream DNA fragment of <i>glcDEF</i> operon from the <i>P. putida</i> EM42 chromosome. |
| glcDEF-DR                                                      | CGGCTCACTCGCAACGGTTTTTGTG<br>TTGTTGG                            |                                                                                                                 |

|                                                       |                                                                                                                                                                                                                  |                                                                                                                                     |
|-------------------------------------------------------|------------------------------------------------------------------------------------------------------------------------------------------------------------------------------------------------------------------|-------------------------------------------------------------------------------------------------------------------------------------|
| V-glcDEF-F                                            | ATATCGCCAATCTAGCCAGACAGAAC<br>CG                                                                                                                                                                                 | To verify the constitutively expression <i>glcDEF</i> strain, wild strain yields 790 bp, the engineered strain yields 897 bp.       |
| V-glcDEF-R                                            | TGAACAATGCCAGCAGGTCTGAAGC                                                                                                                                                                                        |                                                                                                                                     |
| P <sub>tac</sub> -RBS                                 | <u>ACAACAACAAAAACCGTTGCGAGTG</u><br><u>AGCCGCGCAAAAAACCGCACCCAGG</u><br>TGCGGTTTTTTGAATTCGAGCTGTTG<br>ACAATTAATCATCGGCTCGTATAATGT<br>GTCAGACTCAATAATAATAAAGGA<br>GGTATCGAATGAATATCCTGTACGACG<br><u>AACGCGTCG</u> | Synthesized DNA fragment of strong constitutive promoter (P <sub>tac</sub> ) and an artificial RBS. Gibson overlaps are underlined. |
| For <i>catRBC</i> gene deletion plasmid construction  |                                                                                                                                                                                                                  |                                                                                                                                     |
| catRBC-UF                                             | ACCTGACCTCCATAGACACACCATGC<br>CCACAGGGG                                                                                                                                                                          | To clone the 1234 bp upstream DNA fragment of <i>catRBC</i> gene from the <i>P. putida</i> EM42 chromosome.                         |
| catRBC-UR                                             | GTAGCTGACATTCATCCGGCAAGGCG<br>CAGGAAAAAGGGTTGC                                                                                                                                                                   |                                                                                                                                     |
| catRBC-ptac-F                                         | AATTTTCACGGTCATATGATACCCTCG<br>TGTGTGAGTTAATC                                                                                                                                                                    | To clone the 149 bp P <sub>tac</sub> promoter.                                                                                      |
| catRBC-ptac-R                                         | GTGGGCATGGTGTGTCTATGGAGGTC<br>AGGTATGATTACTATTGA                                                                                                                                                                 |                                                                                                                                     |
| catRBC-DF                                             | GTGGATAACCGTATTACCGCAGGAAG<br>TTGAGCAAGTCCGG                                                                                                                                                                     | To clone the 1254 bp downstream DNA fragment of <i>catRBCA</i> operon from the <i>P. putida</i> EM42 chromosome.                    |
| catRBC-DR                                             | ACGAGGGTATCATATGACCGTGAAAA<br>TTTCCCACACTGC                                                                                                                                                                      |                                                                                                                                     |
| V-catRBC-F                                            | GTGTCTTGACGACGCGCAG                                                                                                                                                                                              | To verify the <i>catRBC</i> gene deletion strain, wild strain yields 2853 bp, the $\Delta$ <i>catRBC</i> yields 487 bp.             |
| V-catRBC-R                                            | CGCATGCACCGCAAGAACCTGTAC                                                                                                                                                                                         |                                                                                                                                     |
| For <i>catRBCA</i> gene deletion plasmid construction |                                                                                                                                                                                                                  |                                                                                                                                     |
| catRBCA-UF                                            | GACATAACCTCGAACACACACCATGC<br>CCACAGGGG                                                                                                                                                                          | To clone the 1234 bp upstream DNA fragment of <i>catRBCA</i> gene from the <i>P. putida</i> EM42 chromosome.                        |
| catRBCA-UR                                            | GTAGCTGACATTCATCCGGCAAGGCG<br>CAGGAAAAAGGGTTGC                                                                                                                                                                   |                                                                                                                                     |
| catRBCA-DF                                            | GTGGATAACCGTATTACCGCAATCGA<br>GAAACTGCGAAAGCTTGGC                                                                                                                                                                | To clone the 1270 bp downstream DNA fragment of <i>catRBCA</i> operon from the <i>P. putida</i> EM42 chromosome.                    |
| catRBCA-DR                                            | GTGGGCATGGTGTGTGTTTCGAGGTTA<br>TGTCAGTGTGATTTTGC                                                                                                                                                                 |                                                                                                                                     |
| V-catRBCA-F                                           | GGTAGAGATTGCGGATCAGCGACG                                                                                                                                                                                         | To verify the <i>catRBCA</i> gene deletion strain, wild strain yields 3847 bp, the $\Delta$ <i>catRBCA</i> yields 426 bp.           |
| V-catRBC-R                                            | CGCATGCACCGCAAGAACCTGTAC                                                                                                                                                                                         |                                                                                                                                     |
| For <i>phaZ</i> gene deletion plasmid construction    |                                                                                                                                                                                                                  |                                                                                                                                     |
| phaZ-UF                                               | TTTCCTGCGTTATCCCCTGATTCTGTG<br>GATAGCAGACCTTCATCATCAGC                                                                                                                                                           | To clone the 1048 bp upstream DNA fragment of <i>phaZ</i> gene from the <i>P. putida</i> EM42 chromosome.                           |
| phaZ-UR                                               | TGTCAGGCCGCGAGCTGTTGCACGTGA<br>CTCTTGGGTG                                                                                                                                                                        |                                                                                                                                     |

|                                                       |                                                        |                                                                                                                  |
|-------------------------------------------------------|--------------------------------------------------------|------------------------------------------------------------------------------------------------------------------|
| phaZ-DF                                               | CACCCAAGAGTCACGTGCAACAGCT<br>GCGGCCTGACA               | To clone the 1048 bp downstream DNA fragment of <i>phaZ</i> gene from the <i>P. putida</i> EM42 chromosome.      |
| phaZ-DR                                               | CAGATAGCCCAGTAGCTGACATTCAT<br>CCGGCCGCGCAATTGCTTCTT    |                                                                                                                  |
| V-phaZ-F                                              | TCTTTAACGGCATCGGC                                      | To verify the <i>phaZ</i> gene deletion strain, wild strain yields 308 bp, the $\Delta$ <i>phaZ</i> yields 0 bp. |
| V-phaZ-R                                              | TGGCACCATTACCGCA                                       |                                                                                                                  |
| For <i>fadBaxE</i> gene deletion plasmid construction |                                                        |                                                                                                                  |
| fadBaxE-UF                                            | TTTCCTGCGTTATCCCCTGATTCTGTG<br>GATAGCTGGGTATCACCAACCTG | To clone the 893 bp upstream DNA fragment of <i>fadBaxE</i> operon from the <i>P. putida</i> EM42 chromosome.    |
| fadBaxE-UR                                            | ATTTGCTTCCACTGGAGTACTTTCCTT<br>TCAGACGCT               |                                                                                                                  |
| fadBaxE-DF                                            | CTGAAAGGAAAGTACTCCAGTGGAA<br>GCAAATTCGCA               | To clone the 821 bp downstream DNA fragment of <i>fadBaxE</i> operon from the <i>P. putida</i> EM42 chromosome.  |
| fadBaxE-DR                                            | CAGATAGCCCAGTAGCTGACATTCAT<br>CCGGCACATCGACTCGGCTATTCA |                                                                                                                  |
| V-fadBaxE-F                                           | GACCTCAAGAGCCTGACTGC                                   | To verify <i>fadBaxE</i> operon deletion, wild strain yields 966 bp, the $\Delta$ <i>fadBaxE</i> yields 0 bp.    |
| V-fadBaxE-R                                           | GCCGTGGATATTGACCTTGT                                   |                                                                                                                  |
| For <i>fadBA</i> gene deletion plasmid construction   |                                                        |                                                                                                                  |
| fadBA-UF                                              | TTTCCTGCGTTATCCCCTGATTCTGTG<br>GATATGTCCTTCATGCGCGGC   | To clone the 1043 bp upstream DNA fragment of <i>fadBA</i> operon from the <i>P. putida</i> EM42 chromosome.     |
| fadBA-UR                                              | TCCCCTACGCGCAACTGATCTCCAC<br>GATATGGAAG                |                                                                                                                  |
| fadBA-DF                                              | TATCGTGGAGATCAGTTGCGCGTAGC<br>GGGACAGCAG               | To clone the 1048 bp downstream DNA fragment of <i>fadBA</i> operon from the <i>P. putida</i> EM42 chromosome.   |
| fadBA-DR                                              | CAGATAGCCCAGTAGCTGACATTCAT<br>CCGGGGCCACAGCAGTGGCGA    |                                                                                                                  |
| V-fadBA-F                                             | GTCTTCGATGCCACCGTG                                     | To verify <i>fadBA</i> operon deletion, wild strain yields 712 bp, the $\Delta$ <i>fadBA</i> yields 0 bp.        |
| V-fadBA-R                                             | GTTACCGGTCATGATCGCC                                    |                                                                                                                  |
| For pBb(B5)1k-tpa plasmid construction                |                                                        |                                                                                                                  |
| Ptac-TPA-F                                            | GGCAATCCGACGTCTATGGAGGTC<br>AGGTATGATTACTATTGA         | To clone the 143 bp P <sub>tac</sub> promoter.                                                                   |
| ptac-TPA-R                                            | GCTTTCATATGATACCCTCGTGT                                |                                                                                                                  |
| TPA-F                                                 | ACACGAGGGTATCATATGGAAAGCAG<br>CGTTGTCGACACGGT          | To clone the 5218 bp <i>tpa</i> operon from <i>Rhodococcus jostii</i> RHA1.                                      |
| TPA-R                                                 | CGAGTTTGGATCCCTACTTGCGGGCG<br>AGCGAATGACTTT            |                                                                                                                  |
| BR5-F                                                 | TCGCCCCGAAGTAGGGATCCAAACTC<br>GAGTAAGGAT               | To clone the 2517 bp BR5 origin from pBb(B5)1k-GFPuv plasmid.                                                    |
| BR5-R                                                 | CTGACCTCCATAGGACGTCGGAATTG<br>CCAGC                    |                                                                                                                  |

| For pSEVA421-aroY-ectB plasmid construction |                                                                                                                                                                                                                                                                                                                                                                                                                                                                                                                                                                                                                                                                                                                                                                                                                                                                                           |                                                                             |
|---------------------------------------------|-------------------------------------------------------------------------------------------------------------------------------------------------------------------------------------------------------------------------------------------------------------------------------------------------------------------------------------------------------------------------------------------------------------------------------------------------------------------------------------------------------------------------------------------------------------------------------------------------------------------------------------------------------------------------------------------------------------------------------------------------------------------------------------------------------------------------------------------------------------------------------------------|-----------------------------------------------------------------------------|
| pSEVA-F                                     | ACTAGTCTTGGACTCCTGTTGATAG                                                                                                                                                                                                                                                                                                                                                                                                                                                                                                                                                                                                                                                                                                                                                                                                                                                                 | To clone the 3865 bp RK2 origin from pSEVA421 plasmid.                      |
| Ptac-R                                      | ATGATACCCTCGTGTGTGAGTTAAT                                                                                                                                                                                                                                                                                                                                                                                                                                                                                                                                                                                                                                                                                                                                                                                                                                                                 |                                                                             |
| aroY-frag1                                  | <u>ATTA</u> ACTCACACACGAGGGTATCATAT<br>GCAGAACCCGATCAACGACCTGCGCT<br>CCGCGATCGCGCTGCTGCAACGCCAT<br>CCGGGTCACTACATCGAAACCGACCA<br>CCCGGTCGACCCGAACGCCGAAGT<br>GCCGGTGTGTACCGCCACATCGGTGC<br>GGGTGGCACCCTGAAACGTCCGACC<br>CGCACCGGTCCAGCCATGATGTTCAA<br>CAGCGTGAAGGGCTACCCAGGCAGC<br>CGCATCCTGGTGGGCATGCACGCCAG<br>CCGTGAACGTGCCGCCCTGCTGCTGG<br>GCTGCGTGCCAAGCAAAGTGGCGCA<br>GCACGTGGGCCAGGCCGTGAAGAAC<br>CCGGTGGCCCCAGTGGTGGTGCCAG<br>CCAGCCAAGCCCCATGCCAAGAACA<br>GGTGTCTACGCCGACGACCCGGACT<br>TCGACCTGCGCAAGCTGCTGCCAGCC<br>CCAACCAACACCCCGATCGATGCCGG<br>TCCGTTCTTCTGCCTGGGCCTGGTGC<br>TGCGGAGCGACCCGGAAGATACCAG<br>CCTGACCGACGTGACCATCCACCGCC<br>TGTGCGTGCAAGAGCGCGACGAGCT<br>GAGCATGTTCTGGCCGCCGGTGC<br>ACATCGAGGTGTTCCGCAAGAAGGC<br>CGAAGCCGCCGTAAGCCGCTGCCG<br>GTGACCATCAACATGGGCCTGGACCC<br>AGCCATCTACATCGGTGCCTGCTTCG<br>AAGCGCCAACCACCCCGTTCGGCTAC<br><u>AACGAGCTGGGTGTGGCC</u> | Synthesized DNA fragment 1 of <i>aroY</i> . Gibson overlaps are underlined. |
| aroY-frag2                                  | ACAACGAGCTGGGTGTGGCCGGTGC<br>CCTGCGTCAGCAACCGGTGGAAGT<br>GTGCAGGGCGTGGCCGTGAAAGAG<br>AAGGCGATCGCGCGTGCCGAGATCAT<br>CATCGAGGGCGAACTGCTGCCAGGC<br>GTGCGCGTGCGCAAGATCAGCACA<br>CCAACACCGGTCACGCCATGCCGGA<br>ATTCCCAGGCTACTGCGGTGAGGCCA<br>ACCCGAGCCTGCCGGTGATCAAGGT<br>GAAGGCCGTGACCATGCGCAACCAC<br>GCCATCCTGCAGACCCTGGTGGGTCC<br>GGGTGAGGAACACACCACCTGGCG<br>GGTCTGCCGACCGAAGCCAGCATCC<br>GCAACGCCGTGGAAGAGGCGATCCC<br>AGGCTTCCTGCAGAACGTGTACGCCC<br>ACACCGCCGGTGGCGGTAAGTTCCT                                                                                                                                                                                                                                                                                                                                                                                                              | Synthesized DNA fragment 2 of <i>aroY</i> . Gibson overlaps are underlined. |

|                                                                |                                                                                                                                                                                                                                                                                                                                                                                                                                                                                                                                                                                                                                                                                                                                                                                                       |                                                                           |
|----------------------------------------------------------------|-------------------------------------------------------------------------------------------------------------------------------------------------------------------------------------------------------------------------------------------------------------------------------------------------------------------------------------------------------------------------------------------------------------------------------------------------------------------------------------------------------------------------------------------------------------------------------------------------------------------------------------------------------------------------------------------------------------------------------------------------------------------------------------------------------|---------------------------------------------------------------------------|
|                                                                | GGGCATCCTGCAGGTCAAGAAGCGC<br>CAGCCGAGCGACGAAGGCCGTCAGG<br>GCCAAGCCGCCCTGATCGCCCTGGCC<br>ACCTACAGCGAGCTGAAGAACATCAT<br>CCTGGTGGACGAGGACGTGGACATC<br>TTCGACAGCGACGACATCCTGTGGGC<br>CATGACCACCCGCATGCAGGGCGAC<br>GTGAGCATCACCACCCTGCCAGGCAT<br>CCGTGGCCATCAGCTGGACCCGAGC<br>CAGAGCCCAGACTACAGCACCAGCAT<br>CCGTGGCAACGGCATCAGCTGCAAG<br>ACCATCTTCGACTGCACCGTGCCGTG<br>GGCCCTGAAAGCCCGTTTCGAGCGT<br>GCCCCATTCATGGAAGTGGACCCGAC<br>CCCGTGGGCCCCAGAGCTGTTGAGC<br><u>GACAAGAAGTGAGGAGGTTCAATA</u><br><u>TGCGCCT</u>                                                                                                                                                                                                                                                                                           |                                                                           |
| ecdB-frag                                                      | <u>CAAGAAGTGAGGAGGTTCAATATG</u><br><u>CGCCTGATCGTGGGCATGACCGGTGC</u><br>GACCGGTGCGCCACTGGGCGTGGCC<br>CTGCTGCAGGCCCTGCGTGATATGCC<br>GGAAGTGGAACCCACCTGGTGATG<br>AGCAAGTGGGCCAAGACCACCATCG<br>AGCTGGAACCCCGTACACCGCCCA<br>GGACGTGGCCGCCCTGGCCGATGTG<br>GTGCATAGCCCAGCCGATCAAGCCGC<br>CACCATCAGCAGCGGCAGCTTCCGCA<br>CCGACGGCATGATCGTGATCCCGTGC<br>AGCATGAAAACCTGGCCGGTATCCG<br>TGCCGGTTACGCCGAAGGCCTGGTG<br>GGTCGTGCCGCCGACGTGGTGCTGA<br>AAGAGGGTCGAAGCTGGTCTTGGT<br>GCCACGCGAAACCCCACTGAGCACC<br>ATCCACCTGGAACCATGCTGGCCCT<br>GAGCCGCATGGGCGTGGCCATGGTC<br>CCACCGATGCCAGCCTACTACAACCA<br>CCCGCAGACCGCCGACGACATCACCC<br>AGCACATCGTGACCCGTGTGCTGGAC<br>CAGTTCGGCCTGGAACACAAGAAAG<br>CCCGTCGCTGGAACGGCCTGCAAGC<br>CGCCAAGCACTTCAGCCAAGAGAAC<br>AACGACGGCATCTGA <u>ACTAGTCTTGG</u><br><u>ACTCCTGTTGATAG</u> | Synthesized DNA fragment of <i>ecdB</i> . Gibson overlaps are underlined. |
| <b>For pSEVA421-phaG-alkK-phaC1-phaC2 plasmid construction</b> |                                                                                                                                                                                                                                                                                                                                                                                                                                                                                                                                                                                                                                                                                                                                                                                                       |                                                                           |
| EM7-F                                                          | CCTACGTGCTGACCCGATGAGCGTCG<br>TGACTGGGAAAACC                                                                                                                                                                                                                                                                                                                                                                                                                                                                                                                                                                                                                                                                                                                                                          | To clone the 3857 bp RK2 origin from pSEVA421 plasmid.                    |
| EM7-R                                                          | ATTTCTGGCCTCATGGTATATTCCTCTT<br>GCTAGAATTCGC                                                                                                                                                                                                                                                                                                                                                                                                                                                                                                                                                                                                                                                                                                                                                          |                                                                           |



|         |                                               |                                                                                         |
|---------|-----------------------------------------------|-----------------------------------------------------------------------------------------|
| phaG-F  | AGCAAGAGGAATATACCATGAGGCCA<br>GAAATCGCTGTACT  | To clone the 924 bp <i>phaG</i> gene<br>from the <i>P. putida</i> EM42<br>chromosome.   |
| phaG-R  | TCCCTTTTCTGAAAAGCGGTCAGATG<br>GCAAATGCATGCTG  |                                                                                         |
| alkK-F  | GCATGCATTTGCCATCTGACCGCTTTT<br>CAGAAAAGGGATC  | To clone the 1745 bp <i>alkK</i> gene<br>from the <i>P. putida</i> EM42<br>chromosome.  |
| alkK-R  | GACGCTCCGTTGTCCTGAGTTACAAC<br>GTGGAAAGGAACGC  |                                                                                         |
| phaC1-F | TTCCTTTCCACGTTGTAACCTCAGGAC<br>AACGGAGCGTCGTA | To clone the 1739 bp <i>phaC1</i> gene<br>from the <i>P. putida</i> EM42<br>chromosome. |
| phaC1-R | ACTCCCTCGTCTGATCCATCAACGCTC<br>GTGAACGTAGGTG  |                                                                                         |
| phaC2-F | TACGTTACGAGCGTTGATGGATCAG<br>ACGAGGGAGTGTTG   | To clone the 1744 bp <i>phaC2</i> gene<br>from the <i>P. putida</i> EM42<br>chromosome. |
| phaC2-R | GTTTTCCAGTCACGACGCTCATCGG<br>GTCAGCACGTAGGT   |                                                                                         |

**Supplementary Table 3:** Comparison of microbial mcl-PHA production from PET-derived substrates.

| Substrate                         | Strain                            | Cultivation mode     | mcl-PHA titer (mg/L) | mcl-PHA yield (mg/g <sub>substrate</sub> ) | mcl-PHA yield (mg/g <sub>CDW</sub> ) | Ref.                                    |
|-----------------------------------|-----------------------------------|----------------------|----------------------|--------------------------------------------|--------------------------------------|-----------------------------------------|
| Pure EG                           | <i>P. putida</i> KT2440           | Batch Flask          | 372 <sup>a</sup>     | 60                                         | 321.9                                | Franden et al., 2018 <sup>5</sup>       |
|                                   | <i>Pseudomonas</i> sp. MPC6       | Batch Flask          | 210                  | NA                                         | 155                                  | Orellana-Saez et al., 2019 <sup>6</sup> |
| Pure TPA                          | <i>P. umsongensis</i> GO16        | Fed-batch Bioreactor | 2349 <sup>a</sup>    | 14 <sup>a</sup>                            | 27.0 <sup>a</sup>                    | Kenny et al., 2012 <sup>7</sup>         |
| Pure TPA and EG                   | <i>P. umsongensis</i> GO16        | Batch Bioreactor     | 130                  | 11.95 <sup>a,b</sup>                       | 90                                   | Narancic et al., 2021 <sup>8</sup>      |
| Hydrolyzed PET (TPA) <sup>c</sup> | <i>P. putida</i> GO19             | Batch Flask          | ~207 <sup>a</sup>    | 50 <sup>a</sup>                            | 18.8 <sup>a</sup>                    | Kenny et al., 2008 <sup>9</sup>         |
|                                   | <i>P. frederiksbergensis</i> G023 | Batch Flask          | ~205 <sup>a</sup>    | 50 <sup>a</sup>                            | 18.7 <sup>a</sup>                    | Kenny et al., 2008 <sup>9</sup>         |
|                                   | <i>P. umsongensis</i> GO16        | Fed-batch Bioreactor | ~210 <sup>a</sup>    | 50 <sup>a</sup>                            | 21.0 <sup>a</sup>                    | Kenny et al., 2008 <sup>9</sup>         |
| Hydrolyzed PET (TPA and EG)       | <i>P. umsongensis</i> GO16        | Batch Bioreactor     | 150 <sup>a</sup>     | 14 <sup>b</sup>                            | 7.0                                  | Tiso et al., 2021 <sup>10</sup>         |
|                                   | <i>P. putida</i> consortium       | Batch Flask          | 296.46               | 21.33                                      | 10.16                                | This study                              |
|                                   |                                   | Fed-batch Flask      | 637.30               | 22.57                                      | 11.60                                |                                         |

a: Estimated from reference. b: EG did not reach complete depletion. c: EG was present in hydrolyzed PET but was not utilized as a substrate. NA: Not available.

**Supplementary Table 4:** Comparison of MA production from various substrates.

| Strain                      | Substrate                                | Cultivation mode                                                 | cis-cis MA titer (g/L) | cis-cis MA yield (mol/mol) | Ref.                                      |
|-----------------------------|------------------------------------------|------------------------------------------------------------------|------------------------|----------------------------|-------------------------------------------|
| <i>P. putida</i> KT2440     | Glucose                                  | Fed-batch Bioreactor                                             | 22.0                   | 0.36                       | Bentley, G.J., et al., 2020 <sup>11</sup> |
|                             | Catechol                                 | Fed-batch Bioreactor (Glucose as an additional growth substrate) | 64.2                   | ~1.00                      | Kohlstedt, M., et al., 2018 <sup>12</sup> |
|                             | Hydrolyzed PET (TPA and EG) <sup>a</sup> | Batch Flask (Glucose as an additional growth substrate)          | 4.59                   | 1.01 <sup>b</sup>          | Liu, P., et al., 2022 <sup>13</sup>       |
| <i>P. putida</i> EM42       | Catechol                                 | Fed-batch Bioreactor (Glucose as an additional growth substrate) | 73.8                   | NA                         | Kohlstedt, M., et al., 2022 <sup>14</sup> |
| <i>E. coli</i> MA-1         | Hydrolyzed PET (TPA) <sup>c</sup>        | Whole-cell catalyst                                              | 0.38                   | 0.85                       | Kim, H.T., et al., 2019 <sup>15</sup>     |
| <i>P. putida</i> consortium | Hydrolyzed PET (TPA and EG)              | Batch Flask (EG as an additional growth substrate)               | 4.73                   | 0.64                       | This study                                |

a: EG did not reach complete depletion. b: Probably due to the experimental error. c: EG was removed from the hydrolyzed PET solution prior to fermentation. NA: Not available.

## Supplementary Figures

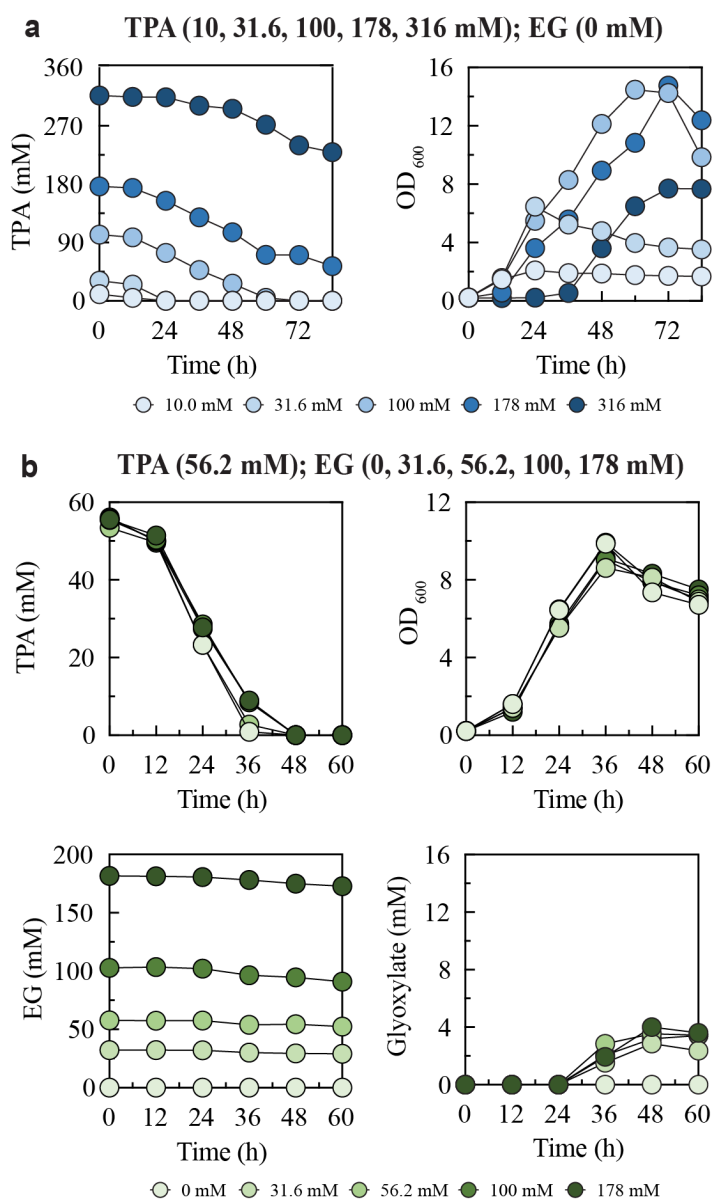

**Supplementary Figure 1: TPA assimilation by the Pp-T strain under various EG levels. a,** Temporal profiles of TPA assimilation (left) and cell growth (right) of Pp-T in the presence of TPA only. Initial TPA concentrations tested include 10, 31.6, 100, 178 and 316 mM. **b,** Temporal profiles of TPA assimilation (top left), cell growth (top right), EG assimilation (bottom left) and glyoxylate accumulation (bottom right) of Pp-T under 56.2 mM TPA mixed with varied EG levels (0, 31.6, 56.2, 100 and 178 mM). Experimental data are presented as mean values with standard deviations from three independent experiments. Source data are provided as a Source Data file.

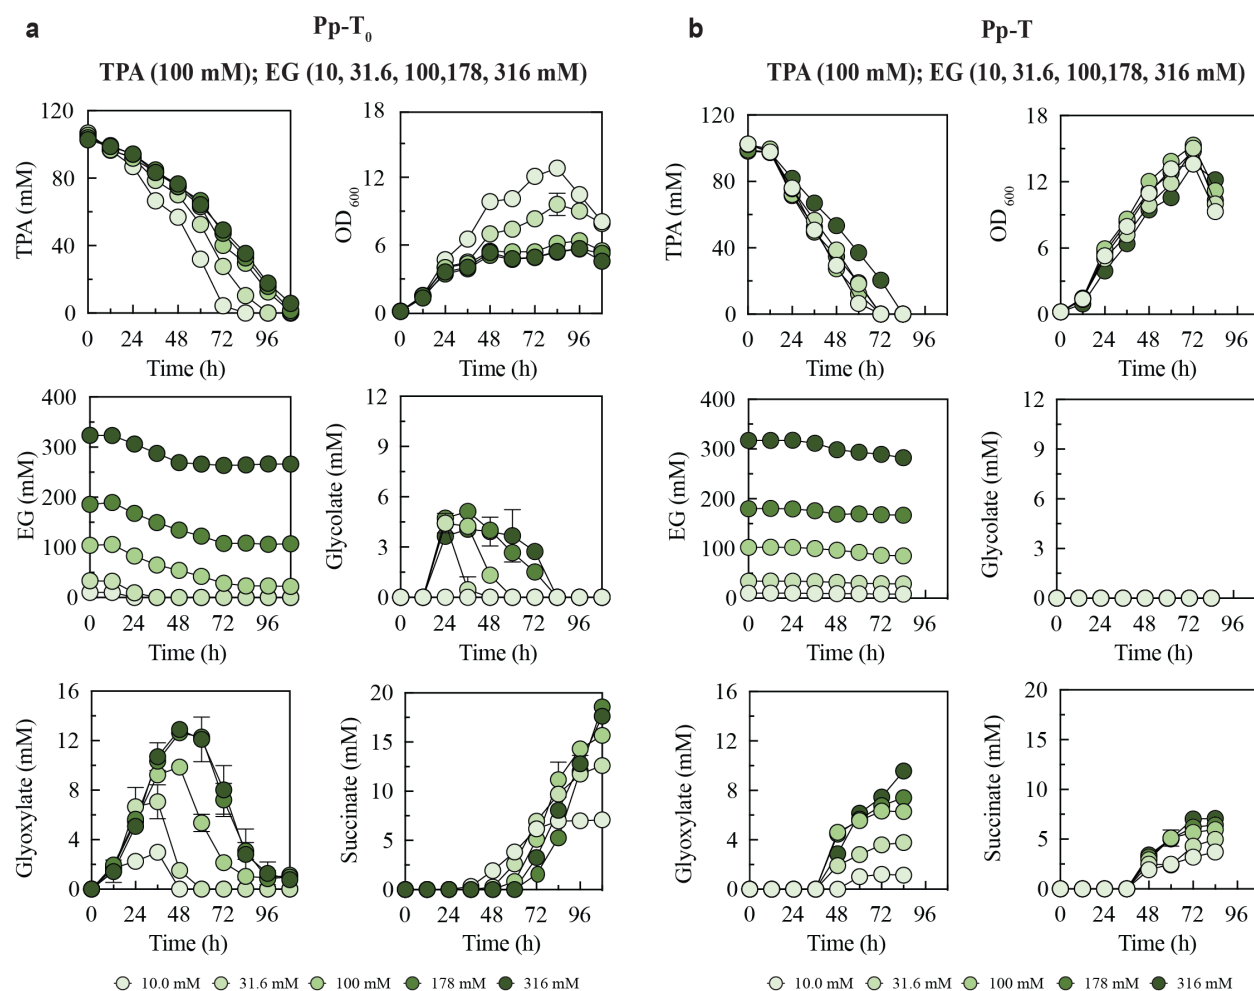

**Supplementary Figure 2: Comparison of metabolite concentrations and cell growth TPA-utilizing strains Pp-T<sub>0</sub> and Pp-T.** **a,b**, Temporal profiles of TPA assimilation (top left), cell growth (top right), EG assimilation (middle left), glycolate accumulation (middle right), glyoxylate accumulation (bottom left), and succinate accumulation (bottom right) of Pp-T<sub>0</sub> (**a**) and Pp-T (**b**). In both panels, a fixed 100 mM of TPA but varied EG concentrations (10, 31.6, 100, 178 and 316 mM) were used as different initial conditions. Experimental data are presented as mean values with standard deviations from three independent experiments. Source data are provided as a Source Data file.

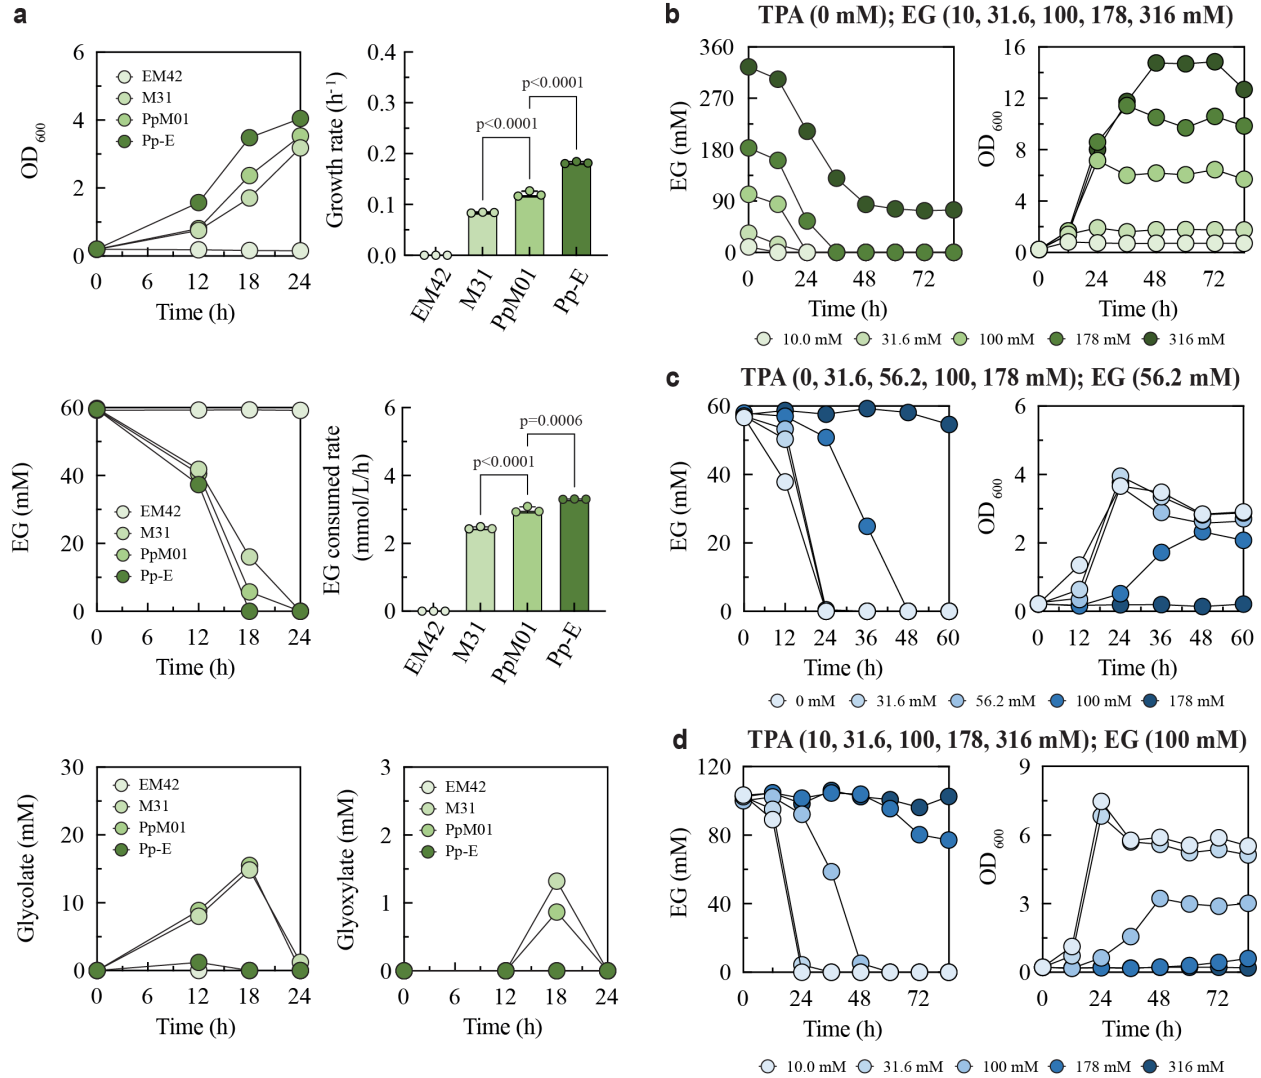

**Supplementary Figure 3: EG assimilation by Pp-E and its parental strains under various TPA levels.** **a**, Temporal profiles of cell growth (top left), growth rate (top right), EG assimilation (middle left), EG consumed rate (middle right), glycolate accumulation (bottom left) and glyoxylate accumulation (bottom right) of *P. putida* EM42, M31, PpM01 and Pp-E (PpM02) in the presence of 56 mM EG only. **b**, Temporal profiles of EG assimilation (left) and cell growth (right) of Pp-E in the presence of EG only. Initial EG concentrations tested include 10, 31.6, 100, 178 and 316 mM. **c,d**, Temporal profiles of EG assimilation (left) and cell growth (right) of Pp-E for different initial TPA and EG mixtures. Panel **c** corresponds to 56.2 mM of EG and varied initial TPA concentrations (0, 31.6, 56.2, 100 and 178 mM). Panel **d** corresponds to 100 mM of initial EG level but varied initial TPA concentrations (10, 31.6, 100, 178 and 316 mM). In panel **a**, the results

of growth rate and EG consumed rate were compared using one-way ANOVA (one-sided) with Dunnett's multiple comparison test. Experimental data are presented as mean values with standard deviations from three independent experiments. Source data are provided as a Source Data file.

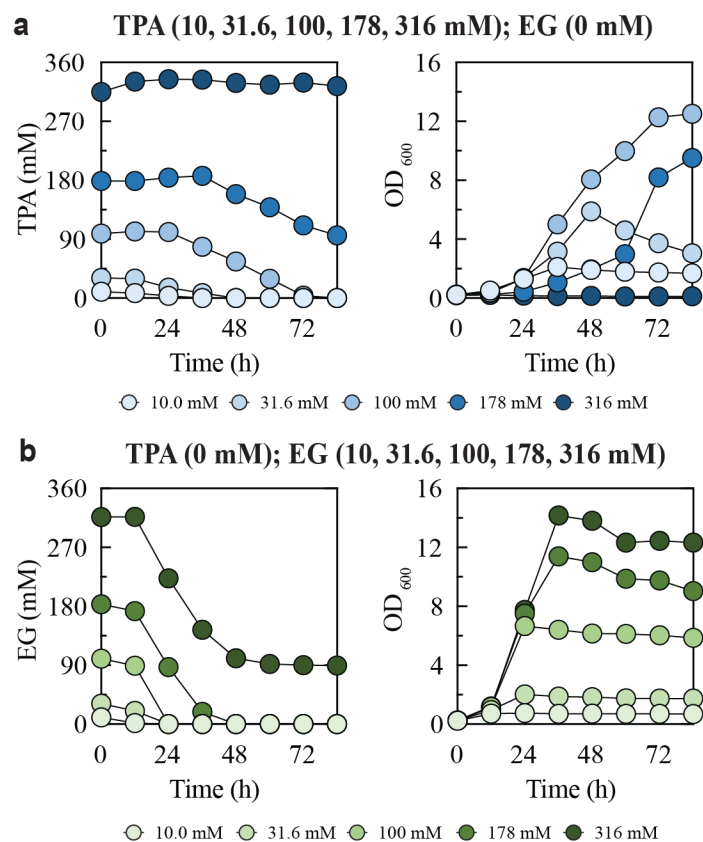

**Supplementary Figure 4: TPA and EG co-consumption by the Pp-TE strain.** **a**, Temporal profiles of TPA assimilation (left) and cell growth (right) of Pp-TE in the presence of TPA only. Initial TPA concentrations tested include 10, 31.6, 100, 178 and 316 mM. **b**, Temporal profiles of the EG assimilation (left) and cell growth (right) of Pp-TE in the presence of EG only. Initial EG concentrations tested include 10, 31.6, 100, 178 and 316 mM. Experimental data are presented as mean values with standard deviations from three independent experiments. Source data are provided as a Source Data file.



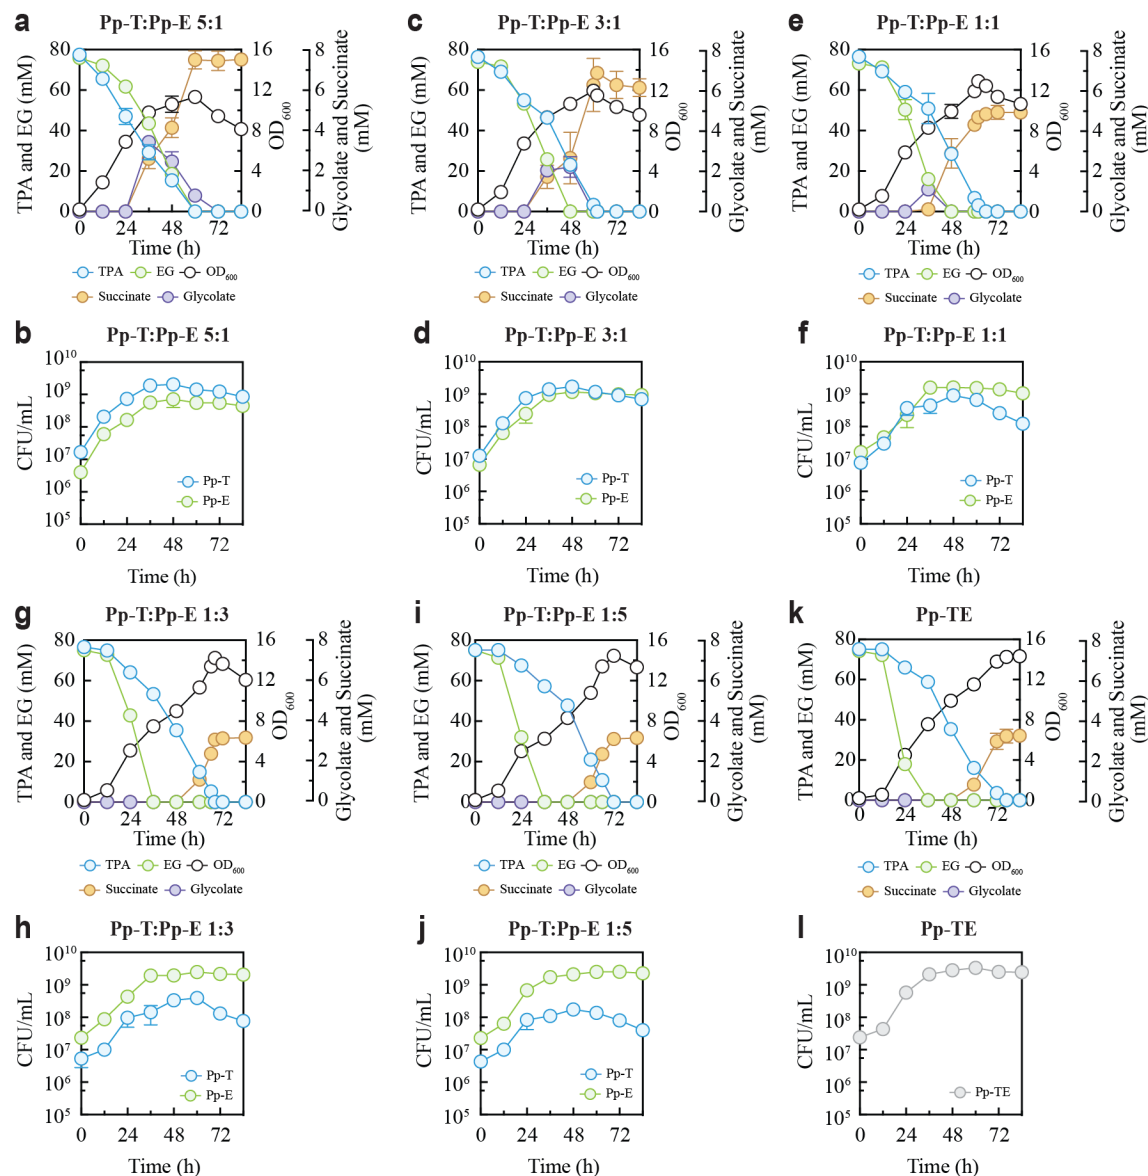

**Supplementary Figure 5: Temporal profiles of metabolite concentrations and cell growth of the T-E consortium with different initial population ratios.** **a-j**, Temporal profiles of TPA, EG, OD<sub>600</sub>, succinate, glycolate, and Pp-T and Pp-E populations (CFU) of the T-E consortium. Different initial Pp-T:Pp-E ratios include 5:1 (**a,b**), 3:1 (**c,d**), 1:1 (**e,f**), 1:3 (**g,h**), and 1:5 (**i,j**). **k,l**, Temporal profiles of TPA, EG, OD<sub>600</sub>, succinate and glycolate (**k**) and temporal population dynamics (**l**) of the single strain Pp-TE. The initial concentrations of TPA and EG were both 75 mM. Experimental data are presented as mean values with standard deviations from three independent experiments. Source data are provided as a Source Data file.

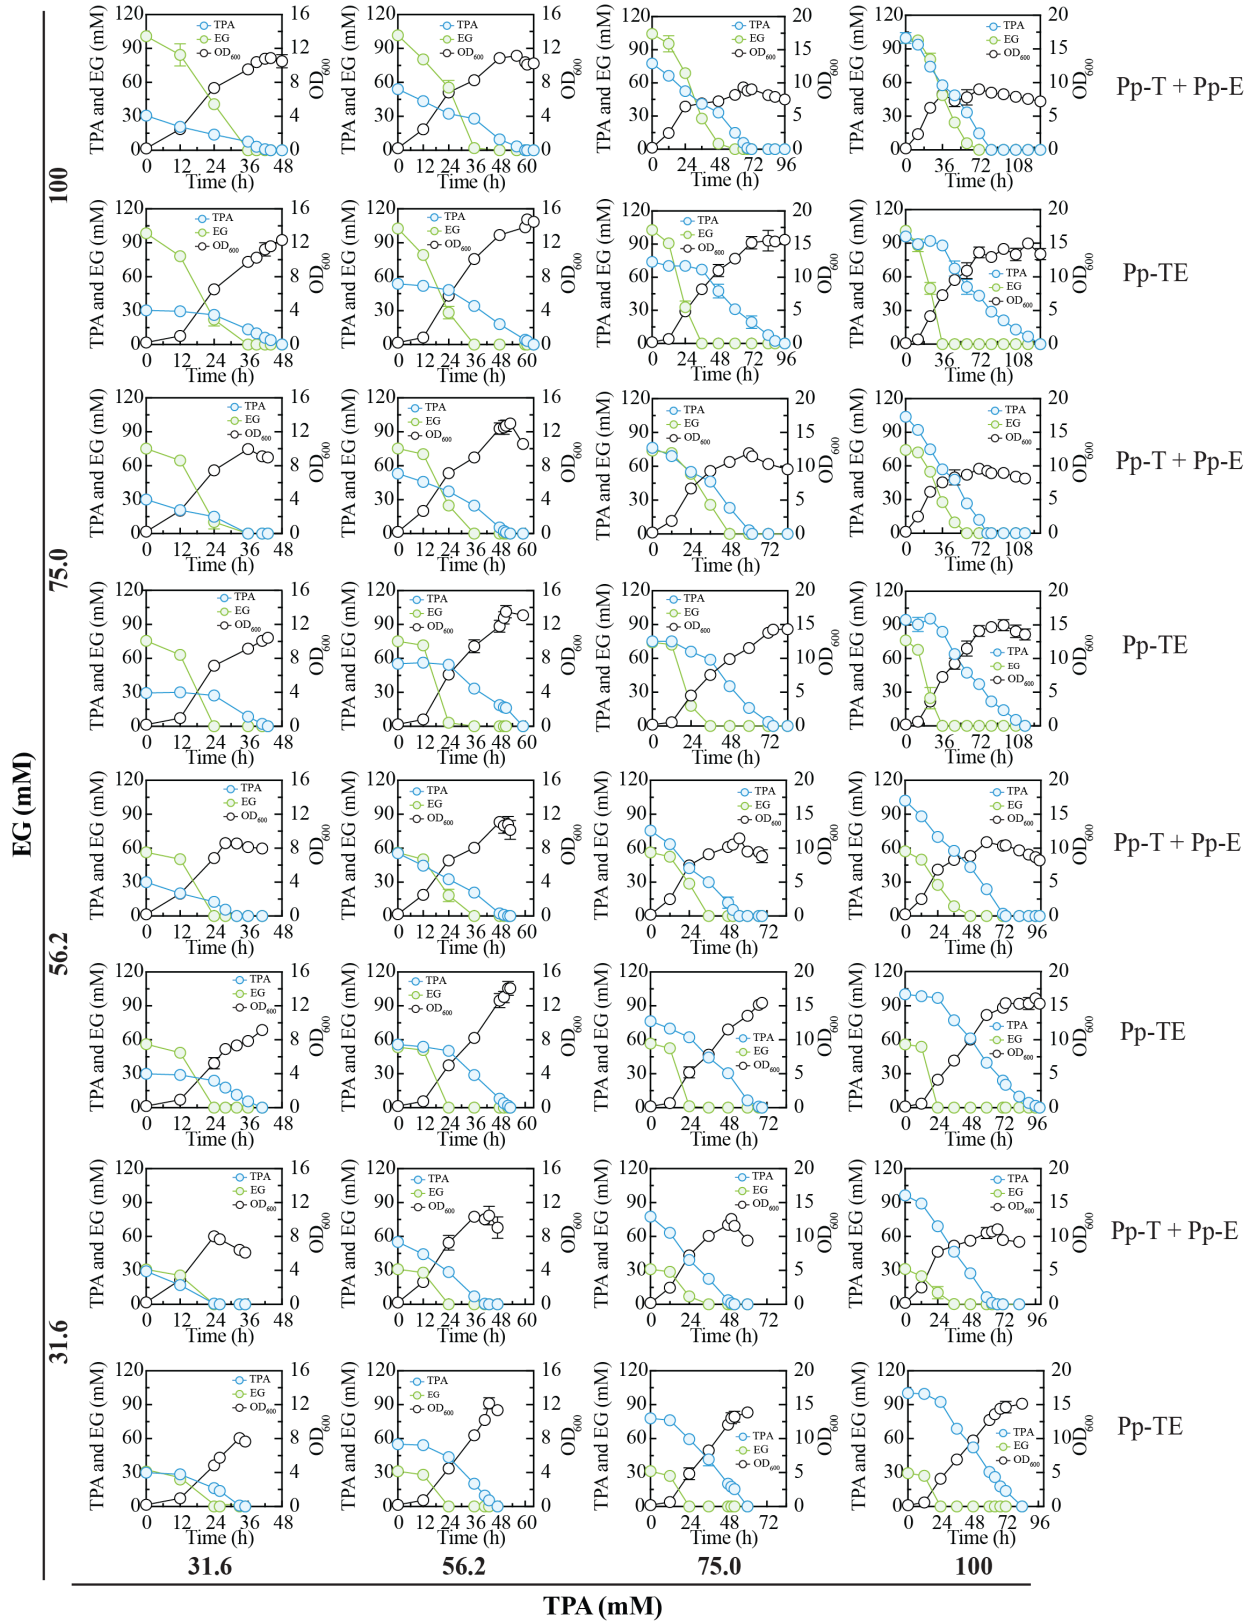

**Supplementary Figure 6: Temporal profiles of substrate utilization and cell growth of the T-E consortium and Pp-TE under various TPA and EG mixtures. A total of 32 fermentations were**

carried out to systematically compare the substrate degradation rates of the T-E consortium and Pp-TE under 16 substrate conditions. A 3:1 inoculation ratio was used for Pp-T and Pp-E. Experimental data are presented as mean values with standard deviations from three independent experiments. Source data are provided as a Source Data file.

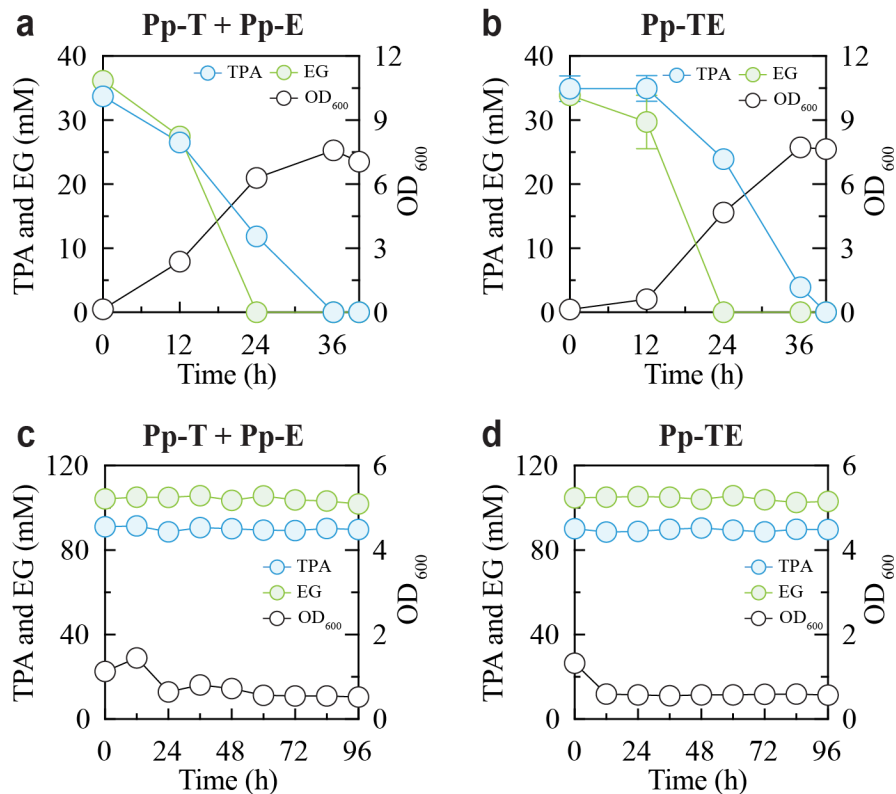

**Supplementary Figure 7: Fermentation of PET hydrolysate by various strains.** **a,b**, Temporal fermentation profiles of the T-E consortium (**a**) and Pp-TE (**b**) with 31.6 mM of initial PET hydrolysate. **c,d**, Temporal fermentation profiles of the T-E consortium (**c**) and Pp-TE (**d**) with 100 mM of initial PET hydrolysate. The measured TPA and EG concentrations deviate slightly from 100 mM due to the minor TPA precipitation at a high concentration. Experimental data are presented as mean values with standard deviations from three independent experiments. Source data are provided as a Source Data file.

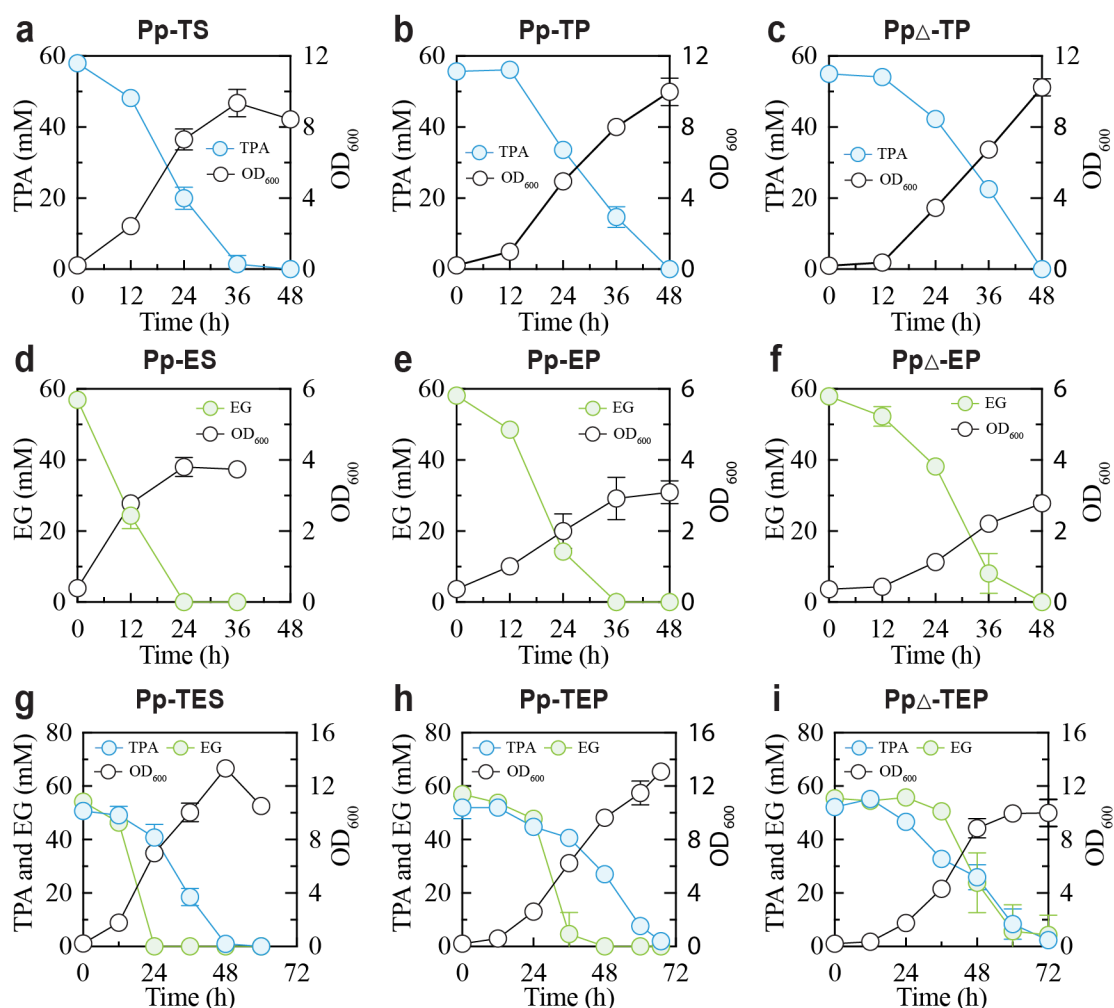

**j**

|               | Yield<br>( $\text{mg}_{\text{PHA}}/\text{g}_{\text{CDW}}$ ) |            | Yield<br>( $\text{mg}_{\text{PHA}}/\text{g}_{\text{TPA}}$ ) |            |            | Yield<br>( $\text{mg}_{\text{PHA}}/\text{g}_{\text{CDW}}$ ) |             | Yield<br>( $\text{mg}_{\text{PHA}}/\text{g}_{\text{EG}}$ ) |  |  | Yield<br>( $\text{mg}_{\text{PHA}}/\text{g}_{\text{CDW}}$ ) |  | Yield<br>( $\text{mg}_{\text{PHA}}/\text{g}_{\text{TPA+EG}}$ ) |  |
|---------------|-------------------------------------------------------------|------------|-------------------------------------------------------------|------------|------------|-------------------------------------------------------------|-------------|------------------------------------------------------------|--|--|-------------------------------------------------------------|--|----------------------------------------------------------------|--|
| <b>Pp-TS</b>  | 48.12±2.90                                                  | 9.72±0.67  | <b>Pp-ES</b>                                                | 2.56±0.17  | 0.96±0.06  | <b>Pp-TES</b>                                               | 98.00±9.53  | 20.95±1.40                                                 |  |  |                                                             |  |                                                                |  |
| <b>Pp-TP</b>  | 64.55±4.32                                                  | 14.01±1.37 | <b>Pp-EP</b>                                                | 20.79±1.63 | 8.69±0.65  | <b>Pp-TEP</b>                                               | 127.76±7.13 | 28.01±0.82                                                 |  |  |                                                             |  |                                                                |  |
| <b>PpΔ-TP</b> | 63.35±0.44                                                  | 12.20±0.57 | <b>PpΔ-EP</b>                                               | 22.28±1.64 | 11.85±2.80 | <b>PpΔ-TEP</b>                                              | 102.05±3.05 | 20.25±2.67                                                 |  |  |                                                             |  |                                                                |  |

**Supplementary Figure 8: Pure TPA and EG utilization by various mcl-PHA production strains under nitrogen-surplus conditions.** **a-c**, Substrate degradation and cell growth during TPA fermentation by the strains Pp-TS (**a**), Pp-TP (**b**) and PpΔ-TP (**c**), respectively. The initial TPA concentration was 56.2 mM. **d-f**, Substrate utilization and cell growth during EG fermentation by the strains Pp-ES (**d**), Pp-EP (**e**) and PpΔ-EP (**f**), respectively. The initial EG concentration was 56.2

mM. **g-i**, Substrate degradations and cell growth during mixed TPA and EG fermentation by the strains Pp-TES (**g**), Pp-TEP (**h**) and Pp $\Delta$ -TEP (**i**), respectively. **j**, The mcl-PHA yields in terms of dry cell or substrate weight of various production strains. The initial concentrations of TPA and EG were both 56.2 mM. Experimental data are presented as mean values with standard deviations from three independent experiments. Source data are provided as a Source Data file.

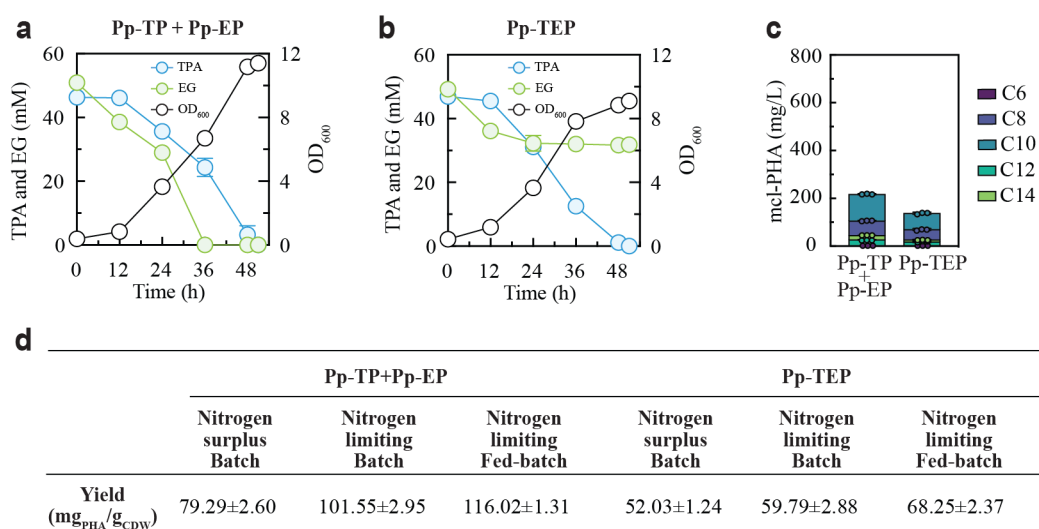

**Supplementary Figure 9: Hydrolyzed PET fermentation for mcl-PHA production under nitrogen-surplus conditions.** **a,b**, Temporal profiles of direct PET hydrolysate fermentations under nitrogen-surplus condition by the TP-EP consortium (**a**) and the single-strain counterpart Pp-TEP (**b**). An initial 1:3 inoculation ratio was used for Pp-TP and Pp-EP. **c**, The titer and monomer composition of mcl-PHA produced by the TP-EP consortium and Pp-TEP in batch fermentation under nitrogen-surplus conditions. **d**, The mcl-PHA yields from dry cell biomass through the fermentations by the TP-EP consortium and Pp-TEP in various settings. In panels **c,d**, mcl-productions were calculated at the time point when TPA and/or EG were fully degraded. Experimental data are presented as mean values with standard deviations from three independent experiments. Source data are provided as a Source Data file.

### **M9 medium with 5 mM CAT**

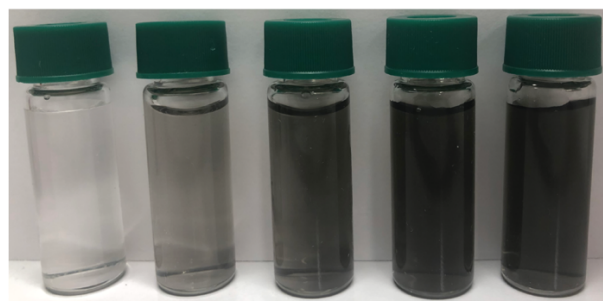

0      6      12      18      24  
Time (h)

**Supplementary Figure 10: Images of M9 medium containing CAT over time.**



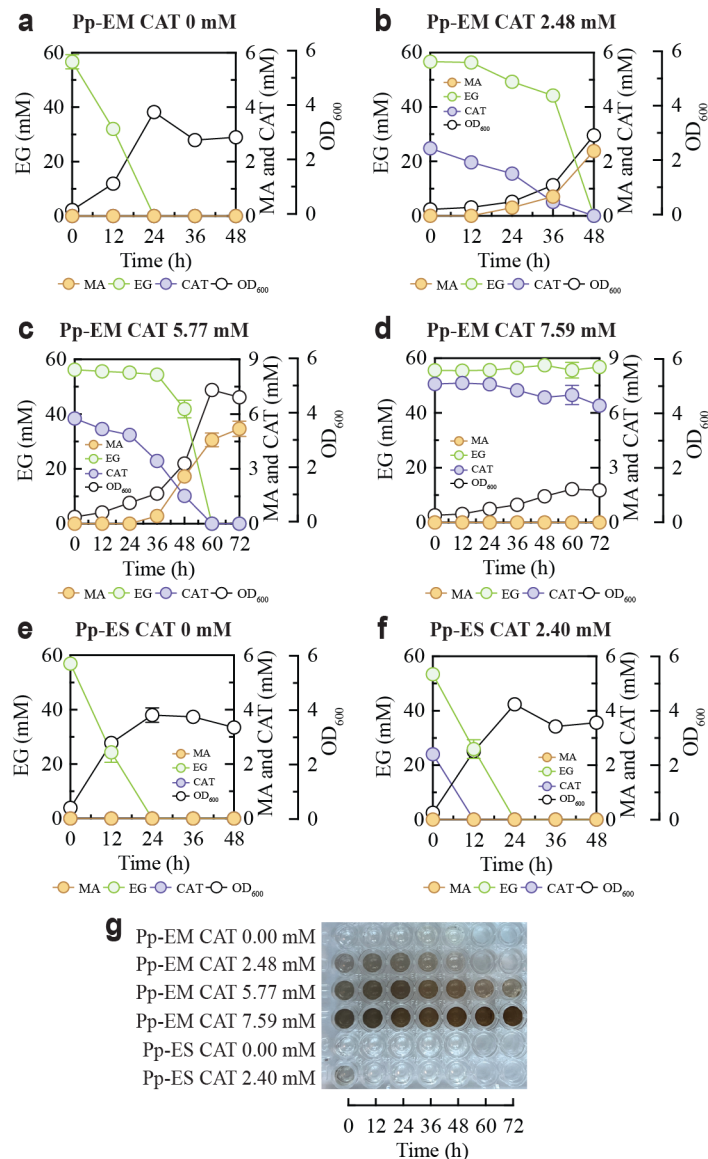

**Supplementary Figure 11: CAT-to-MA conversion by Pp-EM using EG as the substrate. a-d,** Temporal fermentation and CAT-to-MA conversion profiles of Pp-EM for 56.2 mM EG mixed with 0 mM (a), 2.5 mM (b), 5.0 mM (c) and 7.5 mM (d) of CAT. **e,f,** Temporal fermentation and CAT-to-MA conversion profiles of Pp-ES with 56.2 mM EG and 0 mM (e) or 2.5 mM (f) of CAT. **g,** Color change of the Pp-EM or Pp-ES culture throughout the fermentations in panels a-f. In panels b-d, the measured OD<sub>600</sub> was not accurate due to the precipitation of brown carbon. Experimental data are presented as mean values with standard deviations from three independent experiments. Source data are provided as a Source Data file.

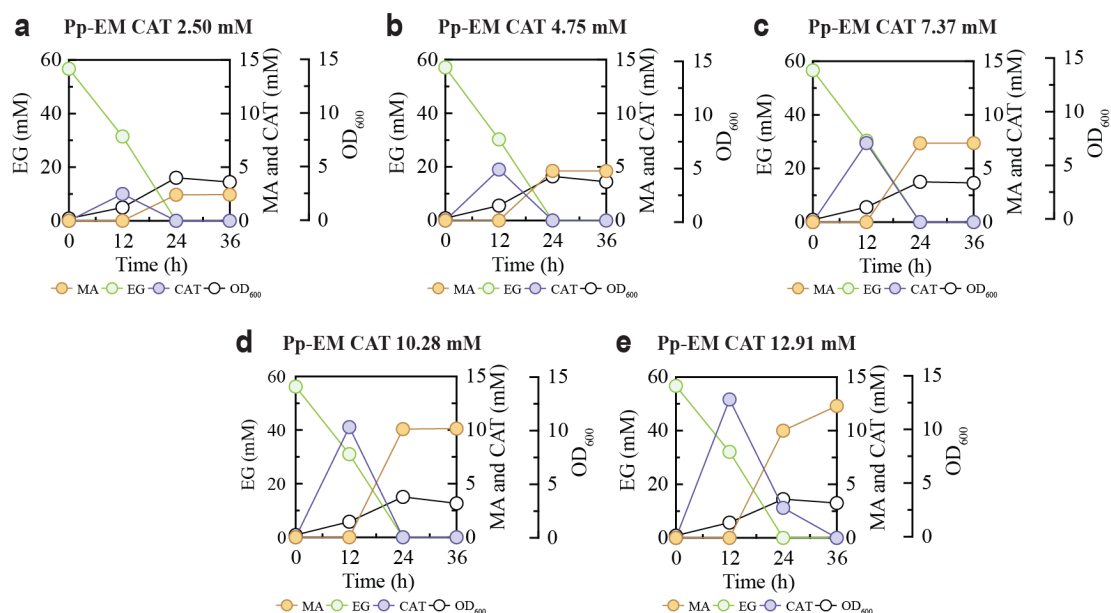

**Supplementary Figure 12: MA production by Pp-EM with CAT added after 12 h of fermentation.**

The fermentations started with 56.2 mM EG at 0 h but were supplemented at 12 h with various levels of CAT, including 2.5 mM (a), 5.0 mM (b), 7.5 mM (c), 10.0 mM (d) and 12.5 mM (e). The temporal profiles of EG, CAT, MA and OD<sub>600</sub> during the fermentations are shown. Experimental data are presented as mean values with standard deviations from three independent experiments. Source data are provided as a Source Data file.

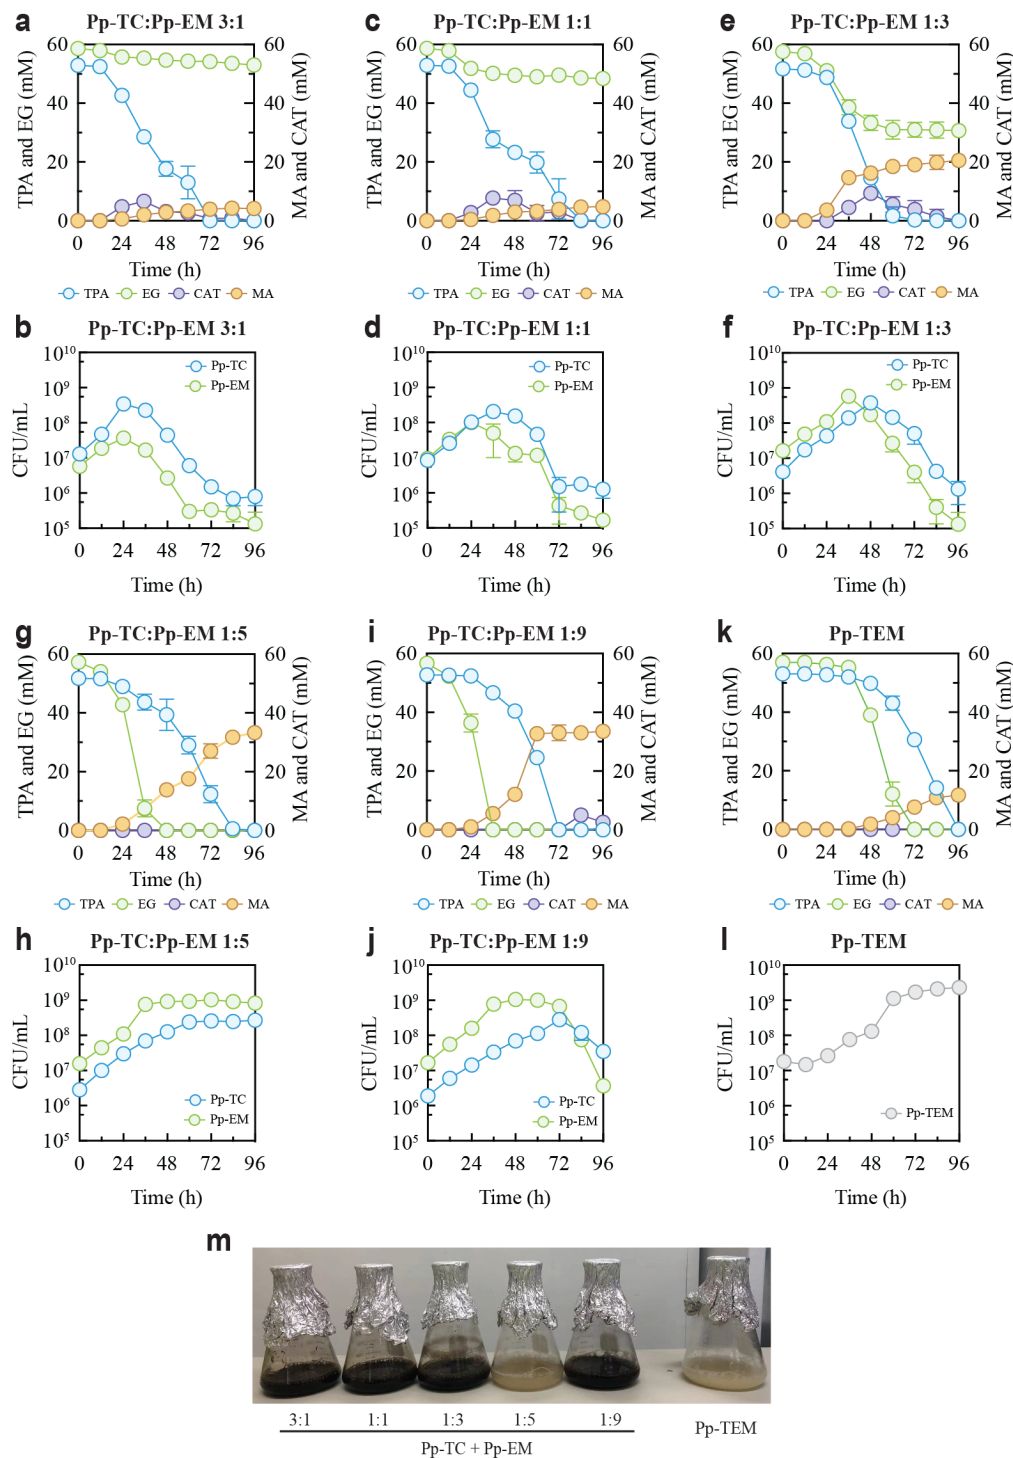

**Supplementary Fig. 13: MA production from PET hydrolysate by the TC-EM consortium by altering the initial population ratio.** a-j, Temporal profiles of TPA, EG, CAT, MA, and Pp-TC and Pp-EM populations during the PET hydrolysate fermentation by the TC-EM consortium. Different initial Pp-TC:Pp-EM ratios were tested, including 3:1 (a,b), 1:1 (c,d), 1:3 (e,f), 1:5 (g,h), and 1:9

(i,j). **k,l**, Temporal profiles of TPA, EG, CAT and MA (**k**), and Pp-TEM population (**l**) during the PET hydrolysate fermentation by the single strain Pp-TEM. **m**, Images of the fermentation broths at 96 h for the experiments in panels **a-l** and Fig. **5g**. Experimental data are presented as mean values with standard deviations from three independent experiments. Source data are provided as a Source Data file.

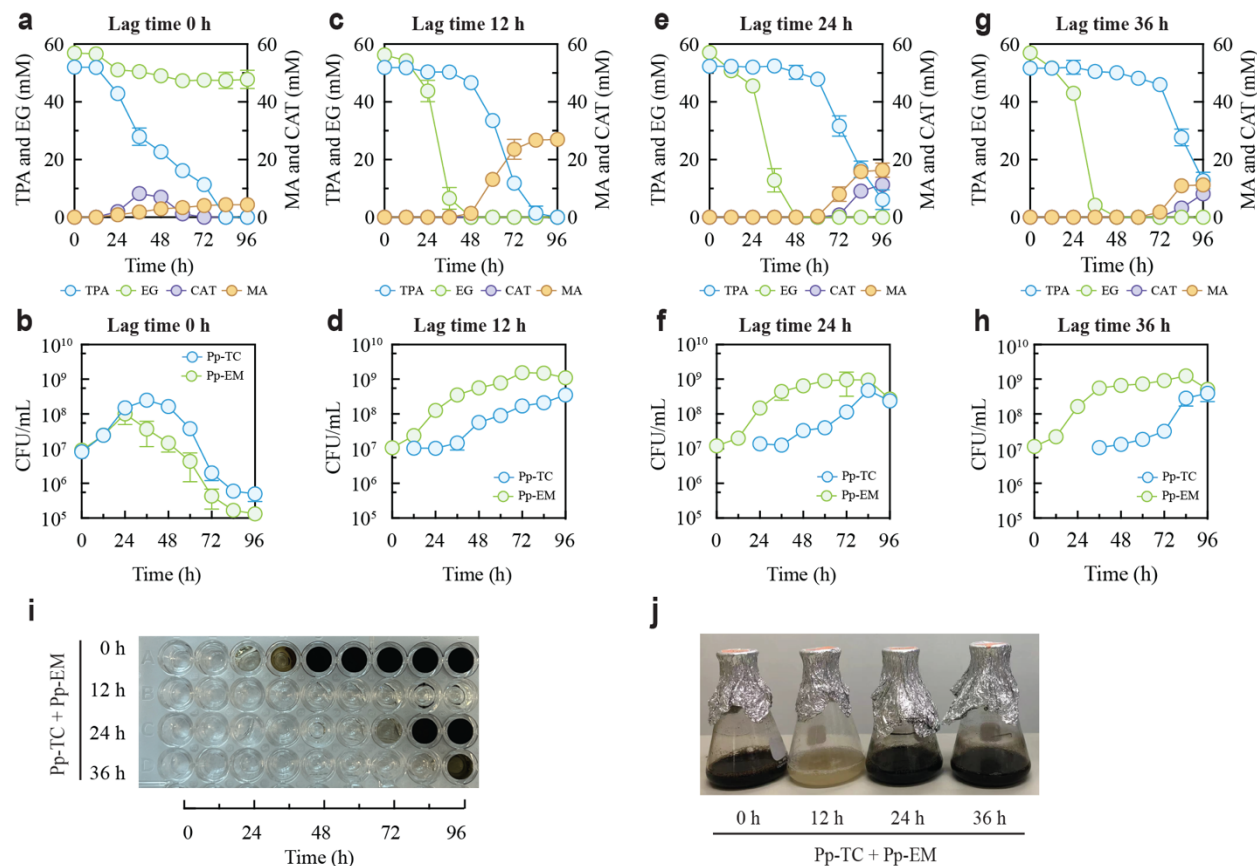

**Supplementary Fig. 14: MA production from PET hydrolysate by the TC-EM consortium by varying the inoculation lag time.** a-h, Temporal profiles of TPA, EG, CAT, MA, and Pp-TC and Pp-EM populations during the PET hydrolysate fermentation by the TC-EM consortium with different lag times between Pp-TC and Pp-EM inoculations. Here, Pp-TC was inoculated after Pp-EM upon different time delays, including 0 h (a,b), 12 h (c,d), 24 h (e,f) and 36 h (g,h). i, Color change of the TC-EM consortium culture throughout the fermentations in panels a-h. j, Images of the final fermentation broths at 96 h for the experiments in panels a-h. Experimental data are presented as mean values with standard deviations from three independent experiments. Source data are provided as a Source Data file.

## References

1. Martínez-García, E., Nikel, P.I., Aparicio, T. & de Lorenzo, V. *Pseudomonas* 2.0: genetic upgrading of *P. putida* KT2440 as an enhanced host for heterologous gene expression. *Microbial cell factories* **13**, 1-15 (2014).
2. Cook, T.B. et al. Genetic tools for reliable gene expression and recombineering in *Pseudomonas putida*. *Journal of Industrial Microbiology & Biotechnology* **45**, 517-527 (2018).
3. Silva-Rocha, R. et al. The Standard European Vector Architecture (SEVA): a coherent platform for the analysis and deployment of complex prokaryotic phenotypes. *Nucleic Acids Research* **41**, D666-D675 (2013).
4. Schafer, A. et al. Small mobilizable multi-purpose cloning vectors derived from the *Escherichia coli* plasmids pK18 and pK19: selection of defined deletions in the chromosome of *Corynebacterium glutamicum*. *Gene* **145**, 69-73 (1994).
5. Franden, M.A. et al. Engineering *Pseudomonas putida* KT2440 for efficient ethylene glycol utilization. *Metabolic Engineering* **48**, 197-207 (2018).
6. Orellana-Saez, M. et al. In-Depth Genomic and phenotypic characterization of the antarctic psychrotolerant strain *Pseudomonas* sp. MPC6 reveals unique metabolic features, plasticity, and biotechnological potential. *Frontiers in Microbiology* **10**(2019).
7. Kenny, S.T. et al. Development of a bioprocess to convert PET derived terephthalic acid and biodiesel derived glycerol to medium chain length polyhydroxyalkanoate. *Applied Microbiology and Biotechnology* **95**, 623-633 (2012).
8. Narancic, T. et al. Genome analysis of the metabolically versatile *Pseudomonas umsongensis* GO16: the genetic basis for PET monomer upcycling into polyhydroxyalkanoates. *Microbial Biotechnology* **14**, 2463-2480 (2021).
9. Kenny, S.T. et al. Up-cycling of PET (polyethylene terephthalate) to the biodegradable plastic pha (polyhydroxyalkanoate). *Environmental Science & Technology* **42**, 7696-7701 (2008).
10. Tiso, T. et al. Towards bio-upcycling of polyethylene terephthalate. *Metabolic Engineering* **66**, 167-178 (2021).
11. Bentley, G.J. et al. Engineering glucose metabolism for enhanced muconic acid production in *Pseudomonas putida* KT2440. *Metabolic Engineering* **59**, 64-75 (2020).
12. Kohlstedt, M. et al. From lignin to nylon: Cascaded chemical and biochemical conversion using metabolically engineered *Pseudomonas putida*. *Metabolic Engineering* **47**, 279-293 (2018).
13. Liu, P. et al. Valorization of polyethylene terephthalate to muconic acid by engineering *Pseudomonas putida*. *International Journal of Molecular Sciences* **23**(2022).
14. Kohlstedt, M. et al. Biobased PET from lignin using an engineered cis, cis-muconate-producing *Pseudomonas putida* strain with superior robustness, energy and redox properties. *Metabolic Engineering* **72**, 337-352 (2022).
15. Kim, H.T. et al. Biological valorization of poly(ethylene terephthalate) monomers for upcycling waste PET. *Acs Sustainable Chemistry & Engineering* **7**, 19396-19406 (2019).
